# Supplementary material for: Enhancing the Community Environment in Populous Residential Districts: Neighborhood Amenities and Residents’ Daily Needs
Source: MDPI journal article supplement (doi:10.3390/su151713255), 2023-09-04
Supplement: s1 [file s1]

## Supplementary Materials:

**Table S1.** The details of socio-demographic characteristics.

| Demographic factors           | Items               | Number (%) |
|-------------------------------|---------------------|------------|
| Age                           | 20-29,              | 336 (31)   |
|                               | 30-39,              | 398 (37.5) |
|                               | 40-49,              | 165 (15.6) |
|                               | 50-59,              | 103 (9.7)  |
|                               | Above60             | 58 (5.5)   |
| Gender                        | male,               | 577 (54.4) |
|                               | female              | 483 (45.6) |
| Family size<br>(Unit: person) | One,                | 81 (7.6)   |
|                               | Two,                | 151 (14.2) |
|                               | Three,              | 470 (44.3) |
|                               | Four,               | 199 (18.8) |
|                               | More than five      | 159 (15.0) |
| Monthly wage<br>(Unit: RMB)   | ≤5000,              | 131 (12.4) |
|                               | 5000-10000,         | 295 (27.8) |
|                               | 10000-20000,        | 364 (34.3) |
|                               | 20000-40000,        | 247 (23.3) |
|                               | ≥50000              | 23 (2.2)   |
| Educational level             | Junior high school, | 49 (4.6)   |
|                               | high school,        | 117 (11.0) |
|                               | Bachelor,           | 688 (64.9) |
|                               | M.Sc or Ph.D.       | 206 (19.4) |
| Marital status                | Non-married,        | 287 (27.1) |
|                               | Married,            | 727 (68.6) |
|                               | Divorced            | 46 (4.3)   |
| Whether have children         | Have children       | 621 (58.6) |
|                               | No                  | 439 (41.4) |
| Total: 1060 respondents.      |                     |            |

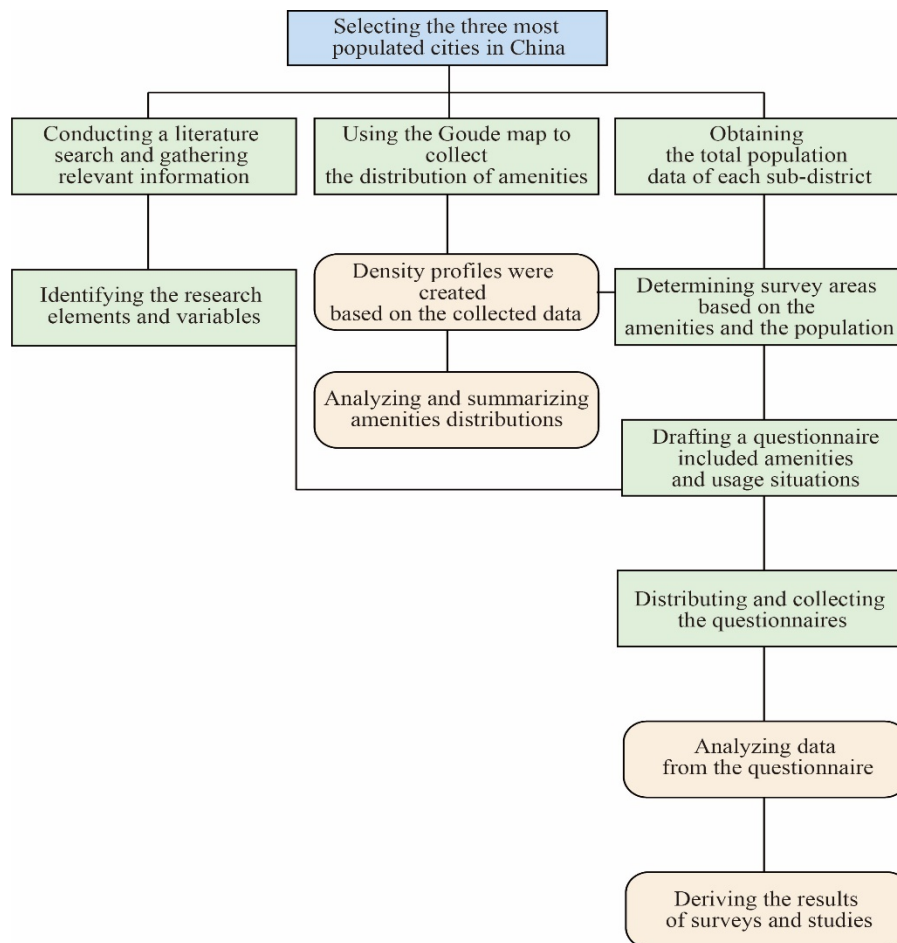

**Figure S1.** The research flow chart
